# Supplementary material for: Controlled supramolecular interaction to enhance the bioavailability of hesperetin to targeted cancer cells through graphyne: a comprehensive in silico study
Source: Royal Society of Chemistry journal article supplement (doi:10.1039/d1ra09112c), 2022-01-01
Supplement: d1ra09112c1.pdf [file d1ra09112c1.pdf]

## Supporting Information

### Controlled Supramolecular Interaction to Enhance the Bioavailability of Hesperetin on Targeted Cancer Cells Through Graphyne: A Comprehensive in Silico study

Maroof Ahmad Khan<sup>a</sup>, Javed Iqbal<sup>\*b</sup>, Mubashar Ilyas<sup>b</sup>, Ali Raza Ayub<sup>a</sup>, Yanhong Zhu<sup>a</sup>, Hui Li<sup>\*a</sup>

<sup>a</sup>Key Laboratory of Clusters Science of Ministry of Education, School of Chemistry and Chemical Engineering, Beijing Institute of Technology, Beijing 100081, P.R.China.

<sup>b</sup>Department of Chemistry, University of Agriculture, Faisalabad-38000, Pakistan.

**Figure S1.** The optimized structure of GRP and HPT@GRP-complex in the aqueous phase.

**Figure S2.** The HOMO-LUMO diagram of HPT, GRP, and HPT@GRP-complex in the gas phase.

**Figure S3.** The HOMO-LUMO diagram of HPT, GRP, and HPT@GRP-complex in the aqueous phase.

**Figure S4.** The MEP diagram of HPT@GRP-complex in an aqueous phase.

**Figure S5.** 3D color-filled iso-surface image of HPT@GRP complex.

**Figure S6.** Electron-density plots (A) ELF image for the GRP present in the HPT@GRP complex (B) ELF image for GRP.

**Figure S7.** The ADCH charges for  $HPT@GRP^{-1/+1}$  complexes.

**Figure S8.** The optimized structure of  $HPT@GRP^{+1}$  complex and  $HPT@GRP^{-1}$  complex.

**Table S1.** The HOMO-LUMO and chemical descriptors include vertical ionization energy, vertical electron affinity, and dipole moment in the aqueous phase.

**Table S2.** The I.R. spectrum information of HPT, GRP, and HPT@GRP-complex.

**Table S3.** ELF (electron-localization function) and NBO analysis.

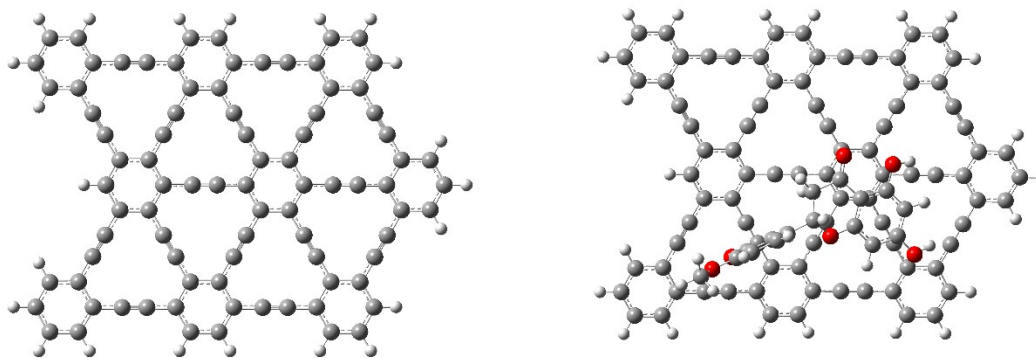

**Figure S1.** The optimized structure of GRP and HPT@GRP-complex in the aqueous phase.

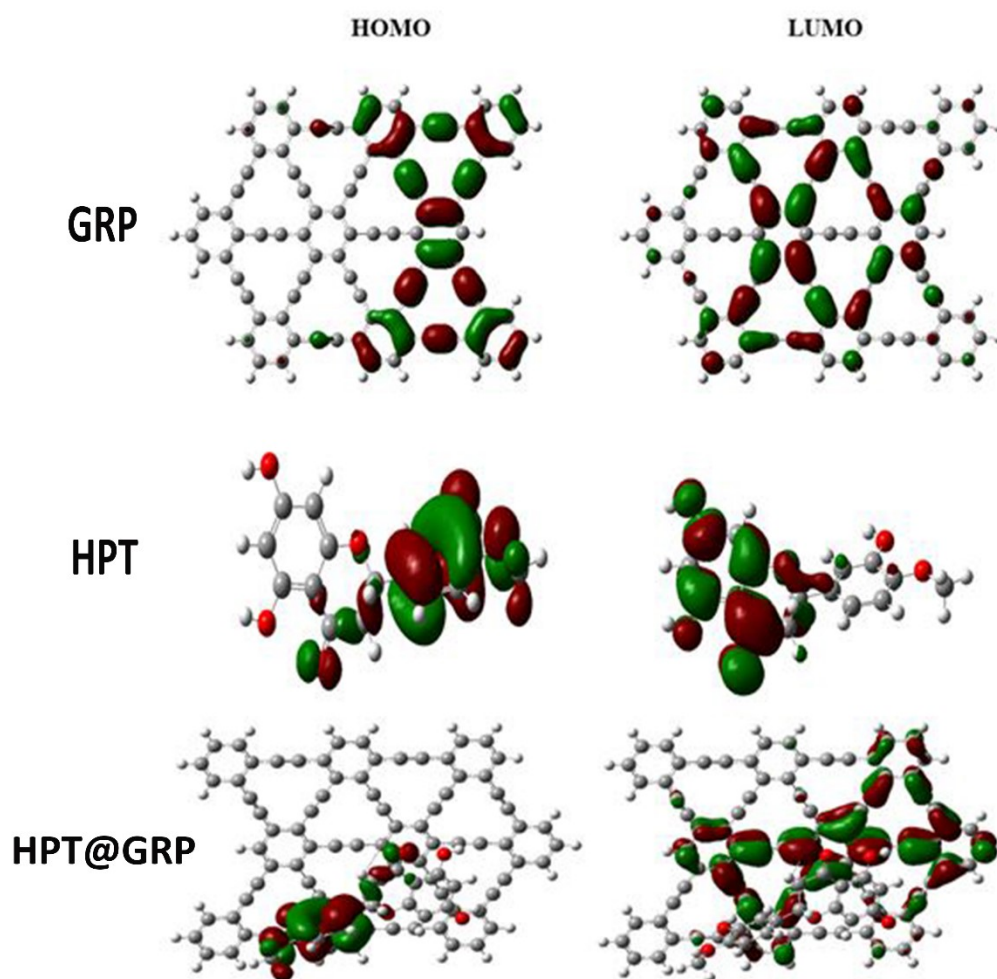

**Figure S2.** The HOMO-LUMO diagram of HPT, GRP and HPT@GRP-complex.

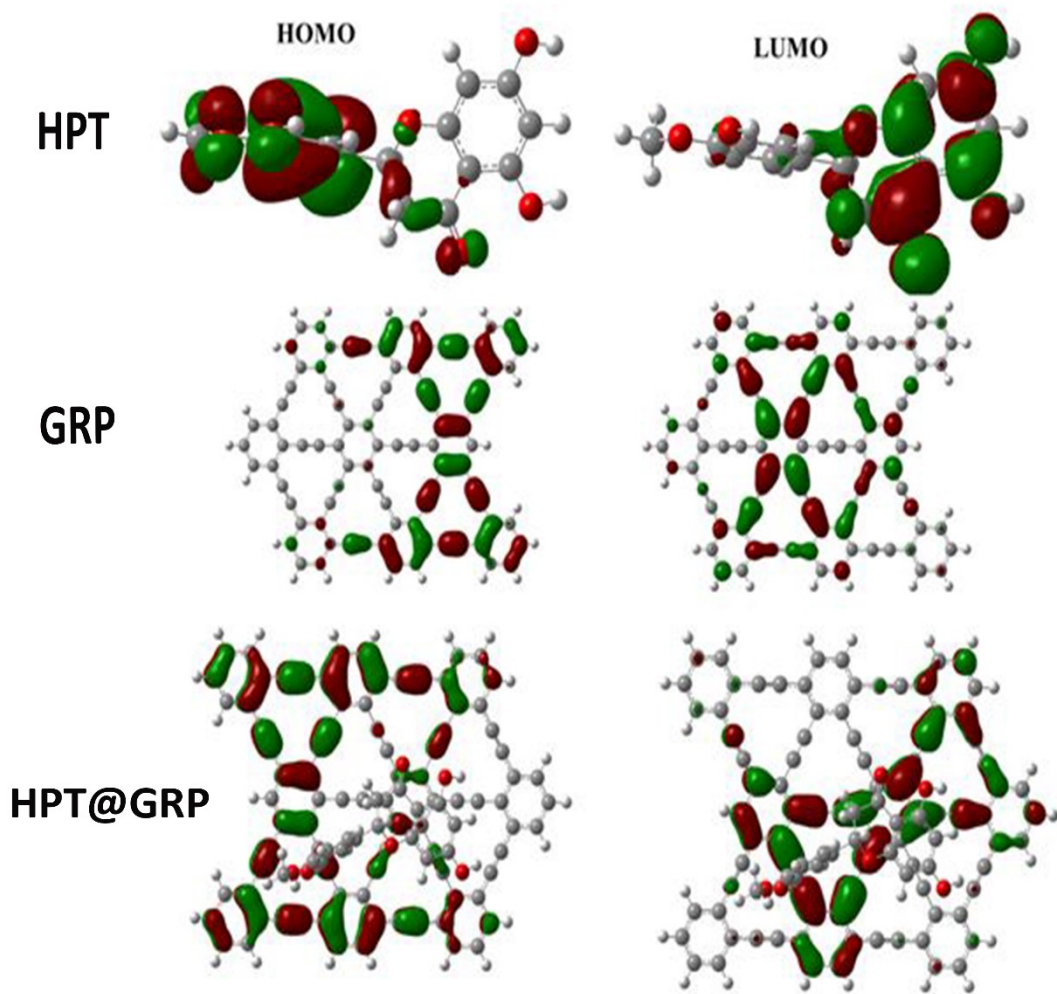

**Figure S3.** The HOMO-LUMO diagram of HPT, GRP and HPT@GRP-complex.

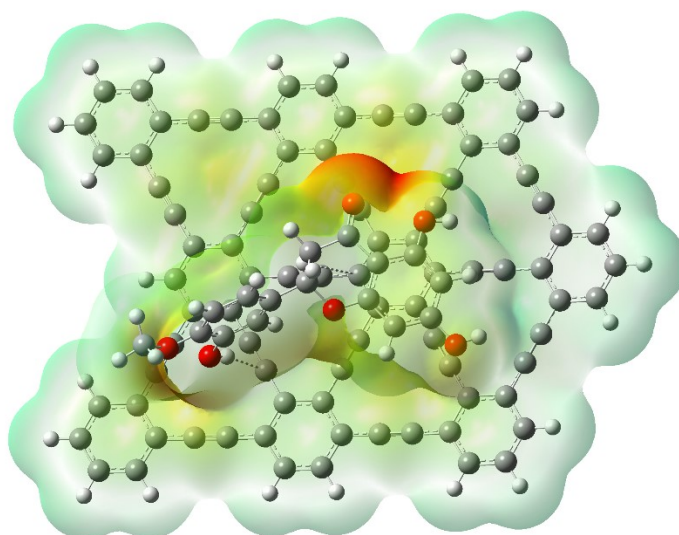

**Figure S4.** The MEP diagram of HPT@GRP-complex in an aqueous phase.

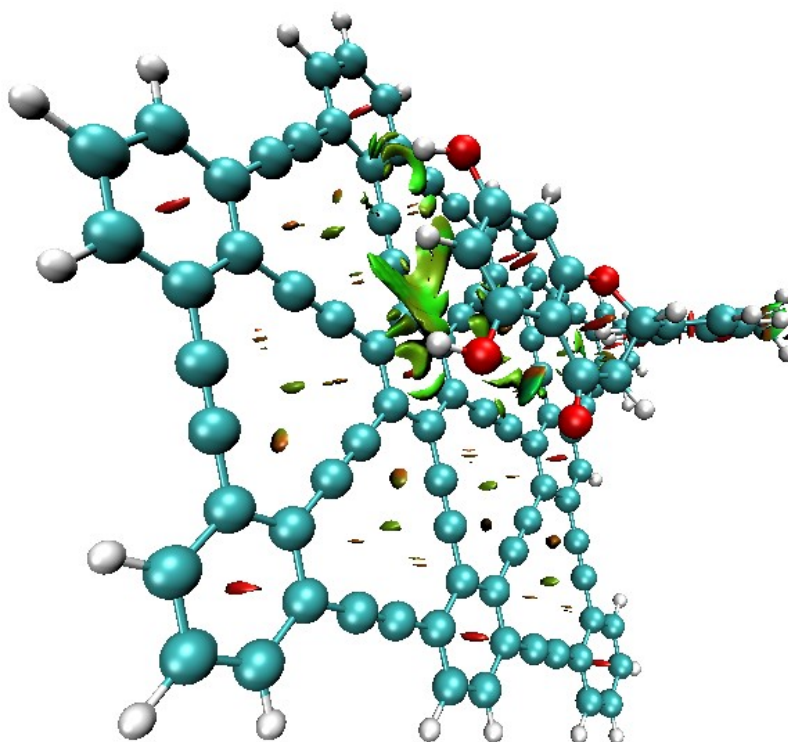

**Figure S5.** 3D color-filled iso-surface image of HPT@GRP complex.

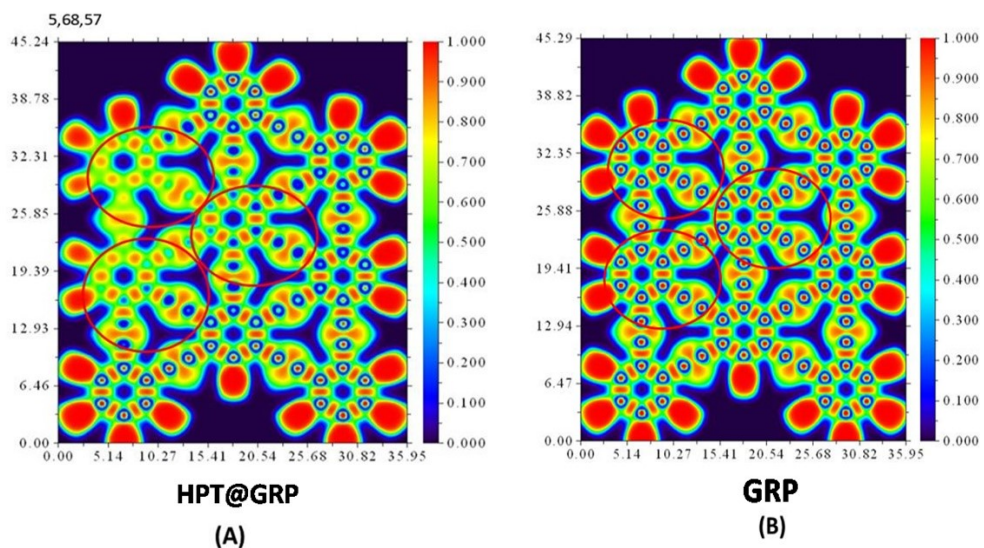

**Figure S6.** Electron-density plots (A) ELF image for the GRP present in the HPT@GRP complex (B) ELF image for GRP.

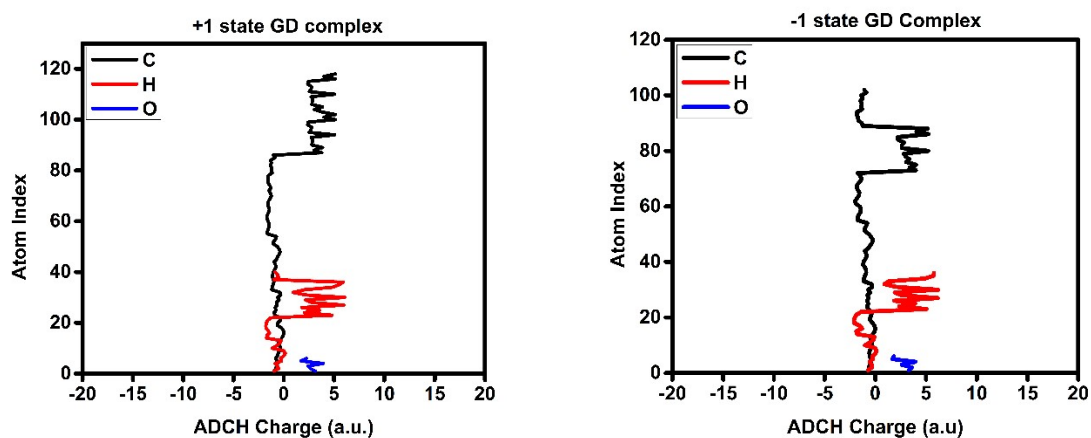

**Figure S7.** The ADCH charges for  $HPT@GRP^{-1/+1}$  complexes.

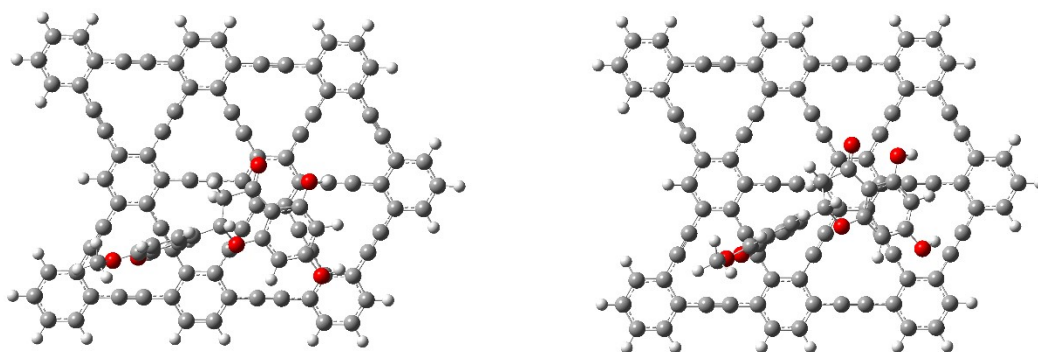

**Figure S8.** The optimized structure of  $HPT@GRP^{+1}$  complex and  $HPT@GRP^{-1}$  complex.

**Table S1.** The HOMO-LUMO and chemical descriptors include vertical ionization energy, vertical electron affinity, and dipole moment in the aqueous phase.

| Parameters             | HPT    | GRP    | HPT@GRP |
|------------------------|--------|--------|---------|
| $E_{\text{HOMO}}$ (eV) | -5.74  | -5.80  | -5.58   |
| $E_{\text{LUMO}}$ (eV) | -1.29  | -3.24  | -3.07   |
| $\Delta E$ (eV)        | 4.447  | 2.56   | 2.51    |
| VIP (eV)               | 5.74   | 5.80   | 5.58    |
| VEA (eV)               | 1.29   | 3.24   | 3.07    |
| $\eta$ (eV)            | 2.223  | 1.28   | 1.25    |
| $\mu$ (eV)             | -3.51  | -4.52  | -4.32   |
| $\chi$ (eV)            | 3.51   | 4.52   | 4.32    |
| $\sigma$               | 0.224  | 0.39   | 0.40    |
| $\omega$ (eV)          | 2.77   | 7.98   | 7.46    |
| Dipole moment          | 4.13D  | 0.47D  | 3.55D   |
| $\lambda_{\text{max}}$ | 200.14 | 520.96 | 525.93  |

**Table S2.** The I.R. spectrum information of HPT, GRP, and HPT@GRP-complex.

| HPT@GRP | HPT     | GRP     | vibration                | Effects   | Comments                       |
|---------|---------|---------|--------------------------|-----------|--------------------------------|
| 3839.87 | 3821.84 | x       | $\nu_s$ O5-H32           | Blueshift | Hydrogen bonding               |
| 3184.01 | 3011.76 | x       | $\nu_s$ C22-H36          | Blueshift | Hydrogen bonding               |
| 3259.21 | x       | 3259.21 | $\nu_s$ C15-H18          | No shift  | No significant effect observed |
| 2401.10 | x       | 2401.21 | $\nu_s$ C29-C28          | No shift  | No significant effect observed |
| 3257.04 | x       | 3256.95 | $\nu_s$ C15-H18          | Blueshift | Van der Waals forces           |
| 3058.25 | 3012.53 | x       | $\nu_s$ C22-H36          | Blueshift | Van der Waals forces           |
| 3175.56 | 3073.38 | x       | $\nu_s$ C8-H25           | Blueshift | Van der Waals forces           |
| 779.32  | 752.51  | x       | $\beta_{as}$ C12-O1-C7   | Blueshift | Week forces + Hydrogen bonding |
| 952.36  | x       | 953.48  | $\beta_s$ C56-C57-C58    | redshift  | Van der Waals forces           |
| 981.58  | x       | 1023.82 | $\beta_{as}$ C95-C96-C71 | redshift  | Van der Waals forces           |

**Table S3.** ELF (electron-localization function) and NBO analysis

| <b>GRP → GRP</b>                                   |                        |                       |
|----------------------------------------------------|------------------------|-----------------------|
| <b>Mode of Transition</b>                          | <b>kcal/mol</b>        |                       |
| $\pi_{C66-C67} \rightarrow \sigma^*_{C126-C137}$   | 0.15                   |                       |
| $\pi_{C101-C102} \rightarrow \pi^*_{C126-C127}$    | 0.13                   |                       |
| $\pi_{C50-C51} \rightarrow \pi^*_{C118-C123}$      | 0.12                   |                       |
| $\pi_{C64-C65} \rightarrow \sigma^*_{C116-C132}$   | 0.12                   |                       |
| $\pi_{C66-C67} \rightarrow \pi^*_{C126-C127}$      | 0.11                   |                       |
| $\pi_{C66-C67} \rightarrow \sigma^*_{C111-C139}$   | 0.09                   |                       |
| $\pi_{C105-C106} \rightarrow \sigma^*_{C121-C134}$ | 0.08                   |                       |
| $\pi_{C50-C51} \rightarrow \pi^*_{C126-C127}$      | 0.06                   |                       |
| <b>HPT → GRP</b>                                   |                        |                       |
| <b>Mode of Transition</b>                          | <b>kcal/mol</b>        |                       |
| $LP(2)_{O114} \rightarrow \pi^*_{C101-C102}$       | 0.15                   |                       |
| $\pi_{C126-C127} \rightarrow \pi^*_{C101-C102}$    | 0.07                   |                       |
| $LP(2)_{O111} \rightarrow \pi^*_{C52-C53}$         | 0.07                   |                       |
| $LP(2)_{O113} \rightarrow \pi^*_{C105-C106}$       | 0.06                   |                       |
| $\pi_{C126-C127} \rightarrow \pi^*_{C66-C67}$      | 0.05                   |                       |
| <b>Energy change before and after adsorption</b>   |                        |                       |
| <b>Mode of Transition</b>                          | <b>Before kcal/mol</b> | <b>After kcal/mol</b> |
| $\pi_{C22-C23} \rightarrow \pi^*_{C20-C21}$        | 20.67                  | 20.88                 |
| $\pi_{C57-C58} \rightarrow \pi^*_{C55-C56}$        | 20.7                   | 20.88                 |
| $\pi_{C45-C46} \rightarrow \pi^*_{C43-C44}$        | 20.24                  | 20.76                 |
| $\pi_{C82-C83} \rightarrow \pi^*_{C80-C81}$        | 20.23                  | 20.4                  |
| $\pi_{C4-C5} \rightarrow \pi^*_{C1-C6}$            | 19.5                   | 19.46                 |
| $\pi_{C1-C6} \rightarrow \pi^*_{C2-C3}$            | 19.42                  | 19.4                  |
| $\pi_{C66-C67} \rightarrow \pi^*_{C59-C60}$        | 13.13                  | 13.06                 |
| $\pi_{C28-C29} \rightarrow \pi^*_{C2-C3}$          | 12.58                  | 12.65                 |
| $\pi_{C97-C98} \rightarrow \pi^*_{C70-C71}$        | 12.39                  | 12.58                 |
| $\pi_{C412-C59} \rightarrow \pi^*_{C40-C41}$       | 11.82                  | 11.76                 |
